# Supplementary material for: Africans Who Arrive in the United States before 20 Years of Age Maintain Both Cardiometabolic Health and Cultural Identity: Insight from the Africans in America Study
Source: MDPI journal article supplement (doi:10.3390/ijerph17249405), 2020-12-15
Supplement: s1 [file s1]

**Table S1: Characteristics by African Region of Origin**

| Parameters <sup>1</sup>                | West<br>52%<br>n=253 | Central <sup>2</sup><br>20%<br>n=96 | East<br>28%<br>n=133 | P-value <sup>3</sup> |
|----------------------------------------|----------------------|-------------------------------------|----------------------|----------------------|
| Current Age (y)                        | 39±1                 | 37±1                                | 38±1                 | 0.430                |
| Age at Immigration (y)                 | 25±1                 | 28±10                               | 27±1                 | 0.125                |
| Male (%)                               | 64%                  | 73%                                 | 62%                  | 0.174                |
| Identify as African (n=255)            | 90%                  | 87%                                 | 94%                  | 0.377                |
| Duration of Residence in US (y)        | 14±11                | 10±1                                | 11±1                 | 0.002, a**, b*       |
| Partnered (%) <sup>4</sup>             | 45%                  | 48%                                 | 53%                  | 0.298                |
| African-born partner (%) (n=113)       | 67%                  | 77%                                 | 87%                  | 0.072                |
| Smoker (%)                             | 5%                   | 4%                                  | 5%                   | 0.918                |
| Alcohol ≥ 1drink/week                  | 24%                  | 25%                                 | 29%                  | 0.529                |
| Physical Activity (n=270) <sup>5</sup> | 80%                  | 82%                                 | 81%                  | 0.950                |
| Health Insurance (%)                   | 68%                  | 66%                                 | 69%                  | 0.849                |
| College Graduate (%)                   | 75%                  | 66%                                 | 71%                  | 0.196                |
| Income ≥40k                            | 51%                  | 37%                                 | 50%                  | 0.037                |
| Hemoglobin (g/dL)                      | 13.9±0.1             | 14.0±0.1                            | 14.2±0.1             | 0.228                |
| Hematocrit (%)                         | 41.7±0.3             | 41.6±0.4                            | 42.2±0.3             | 0.338                |
| Sickle Cell Trait                      | 16%                  | 19%                                 | 8%                   | 0.013                |
| Hemoglobin C Trait                     | 6%                   | 0%                                  | 0%                   | 0.013                |
| Obesity (%)                            | 30%                  | 26%                                 | 23%                  | 0.280                |
| Diabetes (%)                           | 7%                   | 9%                                  | 8%                   | 0.768                |
| CVD-Risk (%)                           | 4.00±0.31            | 4.08±0.54                           | 2.96±0.27            | 0.075                |

<sup>1</sup> Data presented as mean±SE or percentages

<sup>2</sup> The four individuals from southern African countries were analyzed with the Central Africa group

<sup>3</sup> Comparisons were by one-way ANOVA with Bonferroni corrections (a: West vs. Central, b: West vs East, c: Central vs. East, \* $P \leq 0.05$ , \*\* $P \leq 0.01$ , \*\*\* $P \leq 0.001$ ) or chi-square as appropriate.

<sup>4</sup> Married or living with partner (alternative: never married, separated, divorced, widowed)

<sup>5</sup> IPAQ Category (Moderate or High) vs (Low)

**Table S2: Characteristics According to Francophone Status of Country of Origin**

| Parameters <sup>1</sup>                      | Total Cohort<br>100%<br>n=482 | Francophone<br>34%<br>n=162 | Non-Francophone<br>66%<br>n=320 | P-value <sup>2</sup> |
|----------------------------------------------|-------------------------------|-----------------------------|---------------------------------|----------------------|
| <b>Current Age (y)<sup>3</sup></b>           | 38±1                          | 38±1                        | 38±1                            | 0.598                |
| <b>Age at Immigration (y)</b>                | 26±1                          | 29±1                        | 25±1                            | 0.002                |
| <b>Duration of Residence in US (y)</b>       | 12±1                          | 10±1                        | 13±1                            | <0.001               |
| <b>Male (%)</b>                              | 65%                           | 69%                         | 63%                             | 0.241                |
| <b>Obesity (%)</b>                           | 27%                           | 27%                         | 28%                             | 0.824                |
| <b>Diabetes (%)<sup>3</sup></b>              | 8%                            | 7%                          | 8%                              | 0.526                |
| <b>CVD-Risk (%)</b>                          | 3.73±0.21                     | 3.58±0.33                   | 3.81±0.27                       | 0.604                |
| <b>BMI (kg/m<sup>2</sup>)</b>                | 27.6±0.20                     | 27.4±0.36                   | 27.8±0.25                       | 0.436                |
| <b>WC (cm)</b>                               | 91±1                          | 90±1                        | 91±1                            | 0.285                |
| <b>Systolic BP (mmHg)<sup>3</sup></b>        | 120±1                         | 121±1                       | 119±1                           | 0.248                |
| <b>Diastolic BP (mmHg)</b>                   | 72±0.4                        | 73±0.8                      | 72±0.5                          | 0.253                |
| <b>Pulse (beats/min)</b>                     | 67±0.4                        | 67±0.8                      | 68±0.5                          | 0.293                |
| <b>Cholesterol (mg/dL)<sup>3</sup></b>       | 164±1.6                       | 160±2.8                     | 166±1.9                         | 0.091                |
| <b>TG (mg/dL)</b>                            | 73±2                          | 70±3                        | 75±2                            | 0.152                |
| <b>HDL (mg/dL)<sup>3</sup></b>               | 51±1                          | 51±1                        | 51±1                            | 0.955                |
| <b>LDL (mg/dL)</b>                           | 98±1                          | 95±3                        | 100±2                           | 0.151                |
| <b>apoA1 (mg/dL)</b>                         | 133±1                         | 133±1                       | 134±2                           | 0.624                |
| <b>apoB (mg/dL)</b>                          | 82±1                          | 79±2                        | 84±1                            | 0.041                |
| <b>Identify as African (n=255)</b>           | 91%                           | 91%                         | 92%                             | 0.683                |
| <b>Partnered (%)<sup>4</sup></b>             | 48%                           | 52%                         | 46%                             | 0.220                |
| <b>African-born Partner (%) (n=113)</b>      | 76%                           | 86%                         | 70%                             | 0.052                |
| <b>Physical Activity (n=270)<sup>5</sup></b> | 81%                           | 82%                         | 80%                             | 0.728                |
| <b>Smoker (%)<sup>3</sup></b>                | 5%                            | 5%                          | 5%                              | 0.977                |
| <b>Alcohol ≥ 1drink/week</b>                 | 26%                           | 23%                         | 27%                             | 0.302                |
| <b>Income ≥40k</b>                           | 48%                           | 44%                         | 50%                             | 0.249                |
| <b>College Graduate (%)</b>                  | 72%                           | 70%                         | 73%                             | 0.426                |
| <b>American University Degree (n=74)</b>     | 61%                           | 50%                         | 64%                             | 0.280                |
| <b>Health Insurance (%)</b>                  | 68%                           | 66%                         | 69%                             | 0.549                |

<sup>1</sup> Data presented as mean±SE or percentages

<sup>2</sup> Comparisons were unpaired t-tests or chi-square as appropriate.

<sup>3</sup> Variables used to calculate CVD-Risk

<sup>4</sup> Married or living with partner (alternative: never married, separated, divorced, widowed)

<sup>5</sup> IPAQ Category (Moderate or High) vs (Low)

**Table S3: Characteristics by Immigration-Age-Group of Participants from Francophone Countries**

| Parameters <sup>1</sup>                     | Total<br>100%<br>n=162 | Immigration<br>Age<br>Less than 20y<br>n=19 | Immigration<br>Age<br>20 to 65y<br>n=143 | P-value <sup>2</sup> |
|---------------------------------------------|------------------------|---------------------------------------------|------------------------------------------|----------------------|
| <b>Current Age (y)<sup>3</sup></b>          | 38±1                   | 27±1                                        | 39±1                                     | <0.001               |
| <b>Age at Immigration</b>                   | 29±1                   | 14±1                                        | 31±1                                     | <0.001               |
| <b>Duration of Residence in US (y)</b>      | 10±1                   | 14±2                                        | 9±1                                      | <0.001               |
| <b>Male (%)</b>                             | 69%                    | 53%                                         | 71%                                      | 0.113                |
| <b>Obesity (%)</b>                          | 27%                    | 26%                                         | 27%                                      | 0.981                |
| <b>Diabetes (%)<sup>3</sup></b>             | 7%                     | 5%                                          | 7%                                       | 0.778                |
| <b>CVD-Risk (%)</b>                         | 3.58±0.33              | 4.20±0.78                                   | 3.49±0.27                                | 0.403                |
| <b>BMI (kg/m<sup>2</sup>)</b>               | 27.4±0.4               | 27.5±1.1                                    | 27.4±0.4                                 | 0.957                |
| <b>WC (cm)</b>                              | 89.9±0.9               | 90.4±2.7                                    | 89.8±0.9                                 | 0.829                |
| <b>Systolic BP (mmHg)<sup>3</sup></b>       | 121±1                  | 122±3                                       | 120±1                                    | 0.599                |
| <b>Diastolic BP (mmHg)</b>                  | 73±1                   | 75±2                                        | 73±1                                     | 0.258                |
| <b>Pulse (beat/min)</b>                     | 67±1                   | 71±3                                        | 66±1                                     | 0.077                |
| <b>Cholesterol (mg/dL)<sup>3</sup></b>      | 160±3                  | 153±8                                       | 162±3                                    | 0.287                |
| <b>HDL (mg/dL) (male)<sup>3</sup></b>       | 49±1                   | 52±4                                        | 49±1                                     | 0.503                |
| <b>HDL (mg/dL) (female)<sup>3</sup></b>     | 55±2                   | 61±5                                        | 54±2                                     | 0.214                |
| <b>TG (mg/dL)</b>                           | 70±3                   | 61±8                                        | 71±3                                     | 0.252                |
| <b>LDL (mg/dL)</b>                          | 95±3                   | 85±7                                        | 97±2                                     | 0.129                |
| <b>apoA1 (mg/dL) (male)</b>                 | 130±2                  | 132±7                                       | 130±1                                    | 0.728                |
| <b>apoA1 (mg/dL) (female)</b>               | 143±4                  | 148±10                                      | 142±4                                    | 0.589                |
| <b>apoB (mg/dL)</b>                         | 82±1                   | 81±2                                        | 83±1                                     | 0.589                |
| <b>Identify as African (n=76)</b>           | 92%                    | 100%                                        | 91%                                      | 0.416                |
| <b>Partnered (%)<sup>4</sup></b>            | 48%                    | 21%                                         | 56%                                      | 0.004                |
| <b>African-born partner (%) (n=43)</b>      | 86%                    | 67%                                         | 88%                                      | 0.315                |
| <b>Physical Activity (n=78)<sup>5</sup></b> | 80%                    | 100%                                        | 80%                                      | 0.195                |
| <b>Smoker<sup>3</sup></b>                   | 5%                     | 0%                                          | 6%                                       | 0.290                |
| <b>Alcohol ≥ 1drink/week</b>                | 23%                    | 32%                                         | 22%                                      | 0.334                |
| <b>Income ≥40k</b>                          | 44%                    | 37%                                         | 46%                                      | 0.478                |
| <b>College Graduate (%)</b>                 | 70%                    | 63%                                         | 71%                                      | 0.505                |
| <b>American University Degree (n=18)</b>    | 50%                    | 100%                                        | 40%                                      | 0.058                |
| <b>Health Insurance (%)</b>                 | 66%                    | 63%                                         | 66%                                      | 0.777                |

<sup>1</sup> Data presented as mean±SE or percentages

<sup>2</sup> Chi-square or multiple regression adjusting for age

<sup>3</sup> Variables used to calculate CVD-Risk

<sup>4</sup> Married or living with partner (alternative: never married, separated, divorced, widowed)

<sup>5</sup> IPAQ Category (Moderate or High) vs (Low)

**Table S4: Characteristics by Immigration-Age-Group of Participants from Non-Francophone Countries**

| Parameters <sup>1</sup>                 | Total<br>100%<br>n=320 | Immigration<br>Age<br>Less than 20y<br>n=92 | Immigration<br>Age<br>20 to 65y<br>n=228 | P-value <sup>2</sup> |
|-----------------------------------------|------------------------|---------------------------------------------|------------------------------------------|----------------------|
| <b>Current Age (y)<sup>3</sup></b>      | 38±1                   | 32±1                                        | 41±1                                     | <0.001               |
| <b>Age at Immigration</b>               | 25±1                   | 11±1                                        | 31±1                                     | <0.001               |
| <b>Duration of Residence in US (y)</b>  | 13±1                   | 20±1                                        | 10±1                                     | <0.001               |
| <b>Male (%)</b>                         | 63%                    | 53%                                         | 67%                                      | 0.020                |
| <b>Obesity (%)</b>                      | 28%                    | 22%                                         | 30%                                      | 0.143                |
| <b>Diabetes (%)<sup>3</sup></b>         | 8%                     | 4%                                          | 10%                                      | 0.095                |
| <b>CVD-Risk (%)</b>                     | 3.81±0.35              | 3.99±0.41                                   | 3.73±0.25                                | 0.607                |
| <b>BMI (kg/m<sup>2</sup>)</b>           | 27.8±0.2               | 27.7±0.5                                    | 27.8±0.3                                 | 0.858                |
| <b>WC (cm)</b>                          | 91.1±0.7               | 90.5±1.2                                    | 91.3±0.7                                 | 0.599                |
| <b>Systolic BP (mmHg)<sup>3</sup></b>   | 119±1                  | 118±2                                       | 120±1                                    | 0.361                |
| <b>Diastolic BP (mmHg)</b>              | 72±1                   | 71±1                                        | 72±1                                     | 0.372                |
| <b>Pulse (beat/min)</b>                 | 68±1                   | 67±1                                        | 68±1                                     | 0.306                |
| <b>Cholesterol (mg/dL)<sup>3</sup></b>  | 166±2                  | 167±4                                       | 166±2                                    | 0.857                |
| <b>HDL (mg/dL) (male)<sup>3</sup></b>   | 47±1                   | 52±2                                        | 46±1                                     | 0.005                |
| <b>HDL (mg/dL) (female)<sup>3</sup></b> | 58±1                   | 58±2                                        | 58±1                                     | 0.943                |
| <b>TG (mg/dL)</b>                       | 75±2                   | 68±4                                        | 78±3                                     | 0.054                |
| <b>LDL (mg/dL)</b>                      | 100±2                  | 98±3                                        | 101±2                                    | 0.532                |
| <b>apoA1 (mg/dL) (male)</b>             | 129±1                  | 136±3                                       | 126±1                                    | 0.004                |
| <b>apoA1 (mg/dL) (female)</b>           | 140±2                  | 144±4                                       | 138±2                                    | 0.226                |
| <b>apoB (mg/dL)</b>                     | 84±1                   | 83±2                                        | 84±1                                     | 0.643                |
| <b>Identify as African (n=179)</b>      | 91%                    | 88%                                         | 92%                                      | 0.416                |
| <b>Partnered (%)<sup>4</sup></b>        | 46%                    | 30%                                         | 52%                                      | <0.001               |
| <b>African-born Partner (%) (n=70)</b>  | 70%                    | 53%                                         | 75%                                      | 0.112                |
| <b>Exercise (n=192)<sup>5</sup></b>     | 80%                    | 88%                                         | 77%                                      | 0.066                |
| <b>Smoker<sup>3</sup></b>               | 5%                     | 7%                                          | 4%                                       | 0.428                |
| <b>Alcohol ≥ 1drink/week</b>            | 27%                    | 32%                                         | 25%                                      | 0.268                |
| <b>Income ≥40k</b>                      | 50%                    | 57%                                         | 47%                                      | 0.138                |
| <b>College Graduate (%)</b>             | 73%                    | 67%                                         | 75%                                      | 0.142                |
| <b>American Univ Degree (n=56)</b>      | 61%                    | 100%                                        | 38%                                      | <0.001               |
| <b>Health Insurance (%)</b>             | 69%                    | 82%                                         | 64%                                      | 0.002                |

<sup>1</sup> Data presented as mean±SE or percentages

<sup>2</sup> Chi-square or multiple regression adjusting for age

<sup>3</sup> Variables used to calculate CVD-Risk

<sup>4</sup> Married or living with partner (alternative: never married, separated, divorced, widowed)

<sup>5</sup> IPAQ Category (Moderate or High) vs (Low)
